# Supplementary material for: The Hidden Diversity of Temperate Mesophotic Ecosystems from Central Chile (Southeastern Pacific Ocean) Assessed through Towed Underwater Videos
Source: MDPI journal article supplement (doi:10.3390/d15030360), 2023-03-02
Supplement: s1 [file s1]

## Supplementary Materials

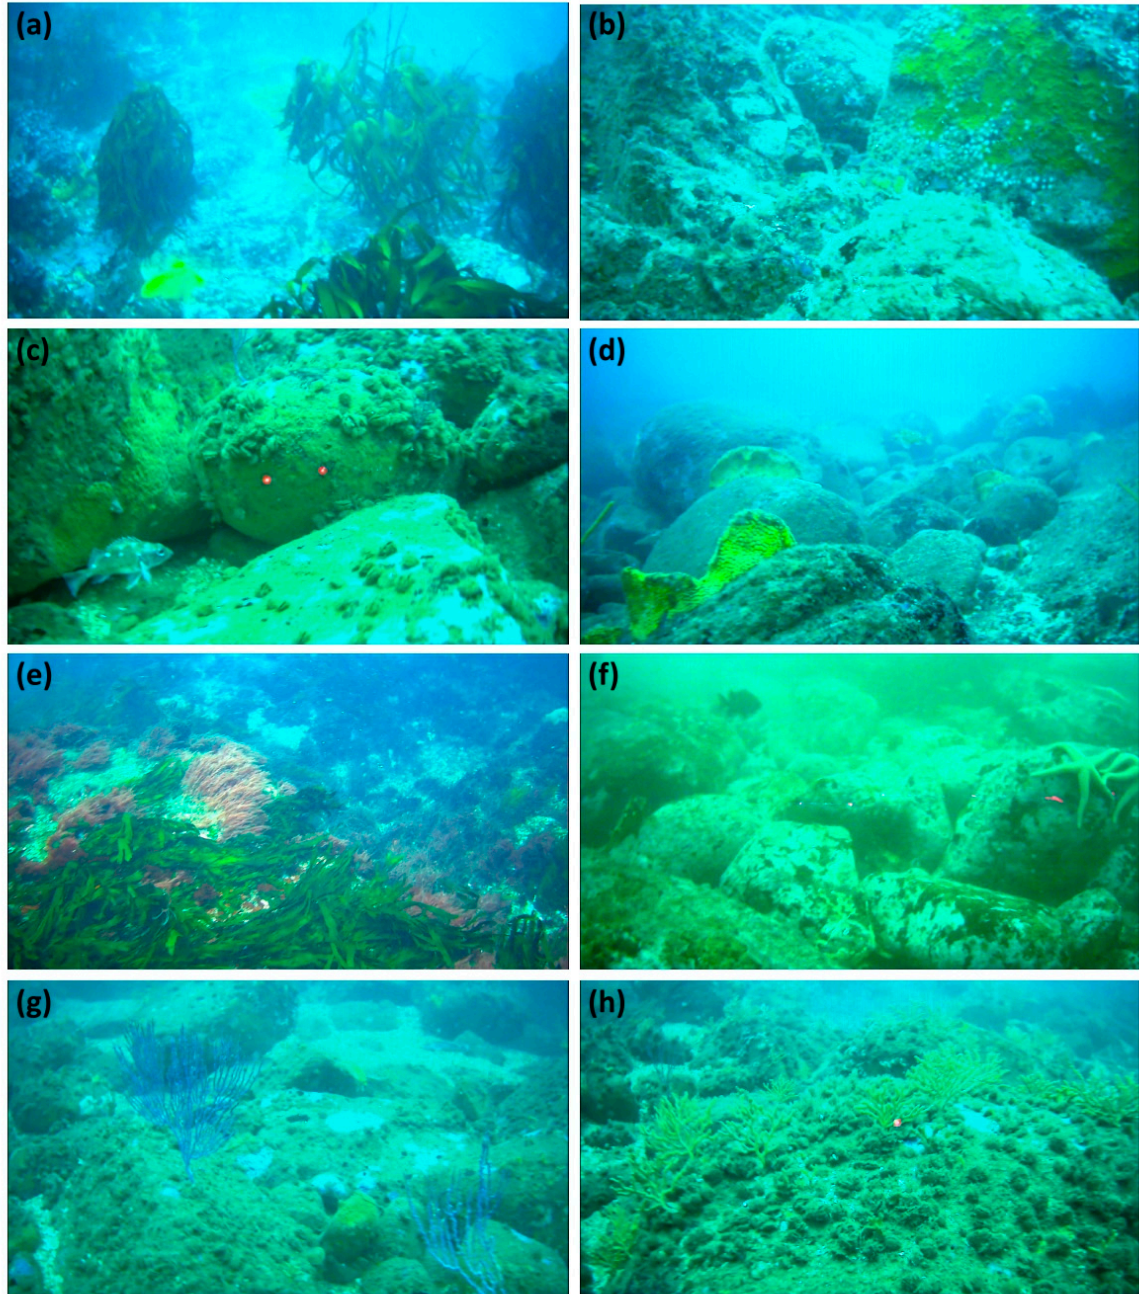

**Figure S1.** Images extracted from the TUV. Some of the main taxa observed in the TUV are pointed on each image. (a) Kelp. Las Cruces, 12.9 m; (b) Actinaria and Porifera. Los Vilos, 47.6 m. (c) Brachiopoda, Porifera, and *Sebastes oculatus*. El Quisco, 50.7 m. (d) Porifera. Las Cruces, 33.5 m. (e) Canopy-forming algae > 5 cm. El Quisco, 9.9 m. (f) *Stichaster striatus* and *Chromis crasma*. Algarrobo, 25.2 m. (g) *Leptogorgia chilensis*. El Quisco, 38.7 m. (h) *Axinella* sp. El Quisco, 50.5 m.

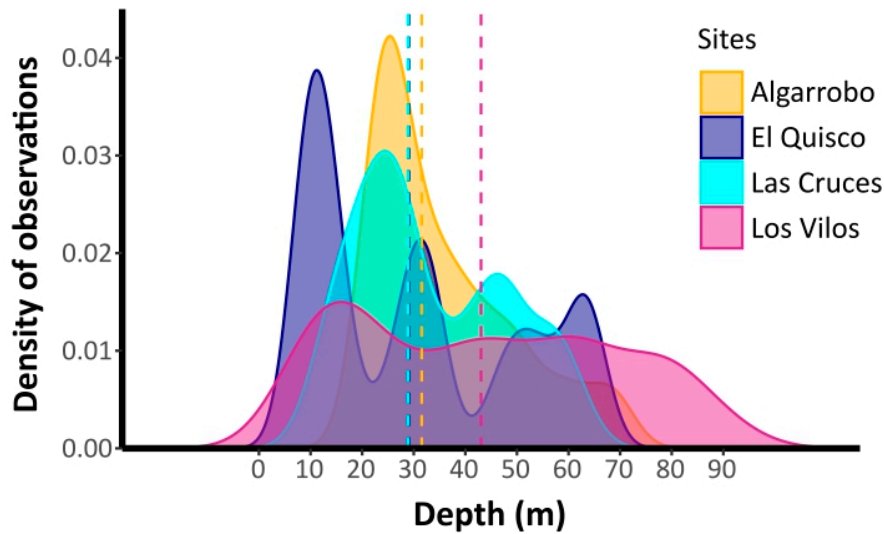

**Figure S2.** Density distribution of sampled depth at each site. Vertical lines represent the median depth sampled at each site (Algarrobo 31.3 m, N=203; El Quisco 28.8 m, N=124 Las Cruces 28.7 m, N=192; Los Vilos 42.8 m, N=259). Observations (N) correspond to 30 sec intervals recorded by the GPS.

**Table S1.** All sites and by-site depth range of fish and benthic taxa, including fish trophic categories. Empty cells correspond to taxon absence, while single depth values are single occurrences. Invert.: invertebrates.

| Taxa                                             | Depth range (m) |           |            |           |           | N  |
|--------------------------------------------------|-----------------|-----------|------------|-----------|-----------|----|
|                                                  | Algarrobo       | El Quisco | Las Cruces | Los Vilos | All sites |    |
| <i>Aplodactylus punctatus</i>                    | 21.7-25.3       | 8.4-31.6  | 11.9-24.2  | 7.02-33   | 7.02-33   | 25 |
| <i>Bovichtus chilensis</i>                       | 22.4            |           |            |           | 22.4      | 1  |
| <i>Cheilodactylus variegatus</i>                 | 22.4-25.3       | 9.6-13.2  | 28.1       | 24.5      | 9.6-28.4  | 12 |
| <i>Chromis crusma</i>                            | 21.7-49.7       | 9.6-48.2  | 16.2-47.2  | 12.8-60.2 | 9.6-60.2  | 48 |
| <i>Girella laevisfrons</i>                       |                 | 25.0      | 19.9       |           | 19.9-25.0 | 2  |
| <i>Graus nigra</i>                               |                 |           |            | 12.8      | 12.8      | 1  |
| <i>Helcogrammoides chilensis/ H. cunninghami</i> | 22.4-32.7       |           |            |           | 22.4-32.7 | 2  |
| <i>Paralabrax humeralis</i>                      |                 |           |            | 13.0      | 13.0      | 1  |
| <i>Pinguipes chilensis</i>                       | 21.7-60.3       | 11.0-54.4 | 19.9-56.3  | 8.5-81.3  | 8.5-81.3  | 71 |
| <i>Prolatilus jugularis</i>                      | 21.7-49.7       |           | 13.4-55.6  | 8.74-24.7 | 8.7-55.6  | 17 |
| <i>Scartichthys viridis</i>                      | 22.4-40.8       | 8.4-31.6  | 21.3-27.7  | 8.5-34.5  | 8.4-40.8  | 32 |

|                                   |           |           |           |           |           |     |
|-----------------------------------|-----------|-----------|-----------|-----------|-----------|-----|
| <i>Schroederichthys chilensis</i> |           | 31.6      |           |           | 31.6      | 1   |
| <i>Sebastes oculatus</i>          | 24.7-60.3 | 22.0-54.4 | 24.7-56.3 | 31.7-88.9 | 22.0-88.9 | 35  |
| <i>Seriola lalandi</i>            |           |           |           | 70.5      | 70.5      | 1   |
| <i>Seriotelella violacea</i>      |           |           | 41.7      |           | 41.7      | 1   |
| Rajiformes                        | 24.7      | 25.0      |           |           | 24.7-25.0 | 2   |
| <i>Trachurus murphyi</i>          | 55.8      |           |           |           | 55.8      | 1   |
| Herbivore detritivores            | 21.8-40.8 | 8.4-31.6  | 11.9-27.7 | 7.0-34.5  | 7.02-40.8 | 59  |
| Generalized carnivores            | 24.7-60.3 | 22.0-54.4 | 24.7-56.3 | 12.8-88.9 | 12.8-88.9 | 42  |
| Mobile invertivores               | 21.7-60.3 | 9.6-54.4  | 13.4-56.3 | 8.5-81.3  | 8.5-81.3  | 104 |
| Planktivores                      | 21.7-49.7 | 9.6-48.2  | 16.2-47.2 | 12.8-60.2 | 9.6-60.2  | 48  |
| Kelp                              |           | 8-32.4    |           | 6.7-39.5  | 6.7-39.5  | 50  |
| Canopy-forming algae < 5cm        | 20.8-47.6 | 8-33.4    | 12.3-38.3 | 6.4-81.4  | 6.4-81.4  | 127 |
| Canopy-forming algae > 5cm        | 18-47.6   | 8-46.6    | 12.3-55.8 | 6.4-75.9  | 6.4-75.9  | 211 |
| Algal turf-invert.-sediment       | 18-50.5   | 8-50.7    | 12.3-55.8 | 6.4-91    | 6.4-91    | 232 |
| Brachiopoda                       | 21.5      | 9.8-50.7  | 46-54.8   | 6.4-57.7  | 6.4-57.7  | 32  |
| Actiniaria                        | 18-36.2   | 9.1-32    | 12.3-55.8 | 6.4-81.4  | 6.4-81.4  | 107 |
| <i>Leptogorgia chilensis</i>      | 30.3-42.8 | 30.7-50.7 | 30.1-39.7 | 25.2-57   | 25.2-57   | 27  |
| Porifera                          | 18-50.5   | 8.2-50.7  | 12.6-55.8 | 6.4-81.4  | 6.4-81.4  | 209 |
| <i>Axinella sp.</i>               | 50.1      | 32-50.5   |           | 54.4-57.9 | 32-57.9   | 7   |
| <i>Tetrapigus niger</i>           | 25.4-47.6 |           | 36.1      |           | 25.4-47.6 | 3   |
| <i>Stichaster striatus</i>        | 21.5-37.4 | 9.1-30.7  | 30.5-33.1 |           | 9.1-37.4  | 15  |
| <i>Odontaster validus</i>         | 23.7-42.4 | 12.1-32.4 | 21.6      | 12.1      | 12.1-42.4 | 8   |
| <i>Meyenaster gelatinosus</i>     |           | 12.6-23.9 |           |           | 12.6-23.9 | 3   |

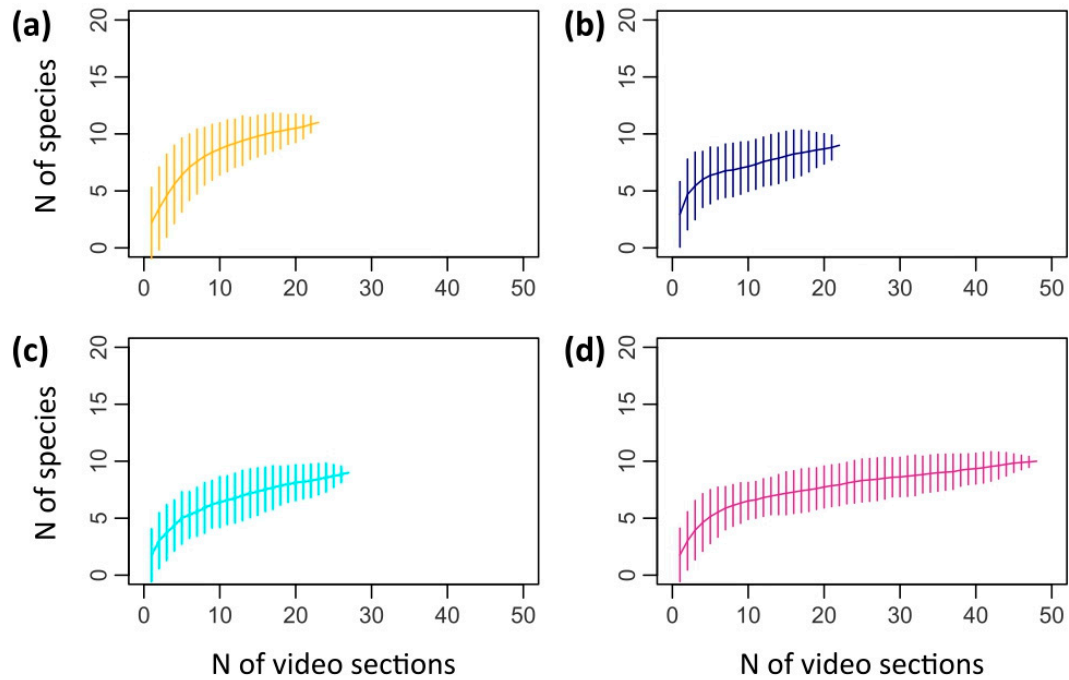

**Figure S3.** Species accumulation curves for the four sampled sites: (a) Algarrobo, (b) El Quisco, (c) Las Cruces and (d) Los Vilos.

**Table S2.** Kruskal-Wallis rank sum test for the density of fish species and trophic categories between depth strata: <20 m (N = 33), 20–40 m (N = 44), 40–60 m (N = 27), >60 m (N = 16). Only species with more than two occurrences on each depth section (N=120) are included, while all recognized fish taxa were grouped in trophic categories. *p*-values <0.05 are highlighted in bold.

|                                  | Chi-squared | df | <i>p</i> -value  |
|----------------------------------|-------------|----|------------------|
| <i>Aplodactylus punctatus</i>    | 31.52       | 3  | <b>&lt;0.001</b> |
| <i>Scartichthys viridis</i>      | 29.98       | 3  | <b>&lt;0.001</b> |
| <i>Sebastes oculatus</i>         | 18.03       | 3  | <b>&lt;0.001</b> |
| <i>Chromis crasma</i>            | 10.66       | 3  | <b>0.014</b>     |
| <i>Cheilodactylus variegatus</i> | 8.09        | 3  | <b>0.044</b>     |
| <i>Pinguipes chilensis</i>       | 18.87       | 3  | <b>&lt;0.001</b> |
| <i>Prolatilus jugularis</i>      | 4.66        | 3  | 0.199            |
| Herbivore detritivores           | 48.44       | 3  | <b>&lt;0.001</b> |
| Generalized carnivores           | 15.19       | 3  | <b>0.002</b>     |
| Mobile invertivores              | 19.8        | 3  | <b>&lt;0.001</b> |
| Planktivores                     | 10.66       | 3  | <b>0.014</b>     |

**Table S3.** Pairwise comparison of fish species and trophic categories that showed a significantly different density among depth bands (<20 m, 20–40 m, 40–60 m, >60 m) using a Bonferroni's correction. *p*-values <0.05 are highlighted in bold.

|                                       | Depth band    | p-value          |
|---------------------------------------|---------------|------------------|
| <i>Aplodactylus punctatus</i>         | <20 – 20-40   | <b>0.004</b>     |
|                                       | <20 – 40-60   | <b>&lt;0.001</b> |
|                                       | <20 - >60     | <b>0.003</b>     |
|                                       | 20-40 – 40-60 | 0.102            |
|                                       | 20-40 - >60   | 0.362            |
|                                       | 40-60 - >60   | -                |
| <i>Scartichthys viridis</i>           | <20 – 20-40   | <b>0.016</b>     |
|                                       | <20 – 40-60   | <b>&lt;0.001</b> |
|                                       | <20 - >60     | <b>0.002</b>     |
|                                       | 20-40 – 40-60 | <b>0.043</b>     |
|                                       | 20-40 - >60   | 0.098            |
|                                       | 40-60 - >60   | 1.000            |
| <i>Sebastes oculatus</i>              | <20 – 20-40   | <b>0.001</b>     |
|                                       | <20 – 40-60   | <b>&lt;0.001</b> |
|                                       | <20 - >60     | <b>&lt;0.001</b> |
|                                       | 20-40 – 40-60 | 1.000            |
|                                       | 20-40 - >60   | 1.000            |
|                                       | 40-60 - >60   | 1.000            |
| <i>Chromis crusma</i><br>Planktivores | <20 – 20-40   | 1.000            |
|                                       | <20 – 40-60   | 1.000            |
|                                       | <20 - >60     | <b>0.037</b>     |
|                                       | 20-40 – 40-60 | 0.622            |
|                                       | 20-40 - >60   | <b>0.020</b>     |
|                                       | 40-60 - >60   | 0.358            |
| <i>Cheilodactylus variegatus</i>      | <20 – 20-40   | 1.00             |
|                                       | <20 – 40-60   | 0.11             |
|                                       | <20 - >60     | 0.38             |
|                                       | 20-40 – 40-60 | 0.24             |
|                                       | 20-40 - >60   | 0.64             |
|                                       | 40-60 - >60   | -                |
| <i>Pinguipes chilensis</i>            | <20 – 20-40   | 0.179            |
|                                       | <20 – 40-60   | 1.000            |
|                                       | <20 - >60     | 0.135            |
|                                       | 20-40 – 40-60 | 0.249            |
|                                       | 20-40 - >60   | <b>&lt;0.001</b> |
|                                       | 40-60 - >60   | <b>0.023</b>     |
| Herbivore detritivores                | <20 – 20-40   | <b>&lt;0.001</b> |
|                                       | <20 – 40-60   | <b>&lt;0.001</b> |

|                        |               |                  |
|------------------------|---------------|------------------|
|                        | <20 - >60     | <b>&lt;0.001</b> |
|                        | 20-40 - 40-60 | <b>0.005</b>     |
|                        | 20-40 - >60   | <b>0.026</b>     |
|                        | 40-60 - >60   | 1.000            |
| Generalized carnivores | <20 - 20-40   | <b>0.006</b>     |
|                        | <20 - 40-60   | <b>0.001</b>     |
|                        | <20 - >60     | <b>0.003</b>     |
|                        | 20-40 - 40-60 | 1.000            |
|                        | 20-40 - >60   | 1.000            |
|                        | 40-60 - >60   | 1.000            |
|                        |               |                  |
| Mobile invertivores    | <20 - 20-40   | 1.000            |
|                        | <20 - 40-60   | 1.000            |
|                        | <20 - >60     | <b>0.004</b>     |
|                        | 20-40 - 40-60 | 0.293            |
|                        | 20-40 - >60   | <b>&lt;0.001</b> |
|                        | 40-60 - >60   | <b>0.014</b>     |
|                        |               |                  |

**Table S4.** Pairwise comparison of the fish community across sites using PERMANOVA (999 permutations). *p*-values <0.05 are highlighted in bold.

|                        | F    | R <sup>2</sup> | <i>p</i> -value |
|------------------------|------|----------------|-----------------|
| Algarrobo - El Quisco  | 5.05 | 0.12           | <b>0.008</b>    |
| Algarrobo - Las Cruces | 1.70 | 0.04           | 0.210           |
| Algarrobo - Los Vilos  | 0.48 | 0.01           | 0.750           |
| El Quisco - Las Cruces | 6.31 | 0.14           | <b>0.006</b>    |
| El Quisco - Los Vilos  | 4.48 | 0.07           | <b>0.008</b>    |
| Las Cruces - Los Vilos | 1.01 | 0.02           | 0.463           |

**Table S5.** Permutation test for homogeneity of multivariate dispersions on the fish community across sites.

|           | Df | Sum Sq | Mean Sq | F    | N. perm | <i>p</i> -value |
|-----------|----|--------|---------|------|---------|-----------------|
| Groups    | 3  | 0.11   | 0.04    | 1.63 | 999     | 0.189           |
| Residuals | 99 | 2.17   | 0.02    |      |         |                 |

# Benthic community

**Table S6.** Kruskal-Wallis rank sum test for the percentage cover data between depth bands: <20 m (N = 73), 20–40 m (N = 109), 40–60 m (N = 47), >60 m (N = 8). *p*-values<0.05 highlighted in bold. Inverteb: invertebrates.

|                              | Chi-squared | df | <i>p</i> -value  |
|------------------------------|-------------|----|------------------|
| Kelp                         | 37.57       | 3  | <b>&lt;0.001</b> |
| Canopy-forming algae <5cm    | 23.41       | 3  | <b>&lt;0.001</b> |
| Canopy-forming algae >5cm    | 17.94       | 3  | <b>&lt;0.001</b> |
| Algal turf-inverteb-sediment | 4.04        | 3  | 0.257            |
| Brachiopoda                  | 9.22        | 3  | <b>0.027</b>     |
| Actiniaria                   | 11.78       | 3  | <b>0.008</b>     |
| Porifera                     | 20.06       | 3  | <b>&lt;0.001</b> |
| <i>Leptogorgia chilensis</i> | 15.69       | 3  | <b>0.001</b>     |
| Bare sand                    | 0.79        | 3  | 0.852            |
| Bare rock                    | 9.61        | 3  | <b>0.022</b>     |

**Table S7.** Pairwise comparison of the percentage cover data that showed a significantly different abundance between depth bands (<20 m, 20–40 m, 40–60 m, >60 m) using a Bonferroni's correction. *p*-values <0.05 are highlighted in bold.

|                           | Depth band    | <i>p</i> -value  |
|---------------------------|---------------|------------------|
| Kelp                      | <20 – 20-40   | <b>&lt;0.001</b> |
|                           | <20 – 40-60   | <b>&lt;0.001</b> |
|                           | <20 – >60     | 0.125            |
|                           | 20-40 – 40-60 | 0.012            |
|                           | 20-40 – >60   | 1.000            |
|                           | 40-60 – >60   | -                |
| Canopy-forming algae <5cm | <20 – 20-40   | <b>0.006</b>     |
|                           | <20 – 40-60   | <b>0.001</b>     |
|                           | <20 – >60     | 1.000            |
|                           | 20-40 – 40-60 | 0.229            |
|                           | 20-40 – >60   | 0.149            |
|                           | 40-60 – >60   | <b>0.019</b>     |
| Canopy-forming algae >5cm | <20 – 20-40   | 1.000            |
|                           | <20 – 40-60   | 0.122            |
|                           | <20 – >60     | <b>0.022</b>     |
|                           | 20-40 – 40-60 | <b>0.011</b>     |
|                           | 20-40 – >60   | <b>0.013</b>     |
|                           | 40-60 – >60   | 0.654            |
| Brachiopoda               | <20 – 20-40   | 1.000            |
|                           | <20 – 40-60   | 0.263            |
|                           | <20 – >60     | 1.000            |

|                              |               |              |
|------------------------------|---------------|--------------|
|                              | 20-40 – 40-60 | <b>0.049</b> |
|                              | 20-40 - >60   | 1.000        |
|                              | 40-60 - >60   | 0.698        |
| Actiniaria                   | <20 – 20-40   | 0.456        |
|                              | <20 – 40-60   | 1.000        |
|                              | <20 - >60     | 0.056        |
|                              | 20-40 – 40-60 | 1.000        |
|                              | 20-40 - >60   | <b>0.009</b> |
|                              | 40-60 - >60   | 0.054        |
| Porifera                     | <20 – 20-40   | <b>0.001</b> |
|                              | <20 – 40-60   | <b>0.001</b> |
|                              | <20 - >60     | 0.215        |
|                              | 20-40 – 40-60 | 1.000        |
|                              | 20-40 - >60   | 1.000        |
|                              | 40-60 - >60   | 1.000        |
| <i>Leptogorgia chilensis</i> | <20 – 20-40   | <b>0.001</b> |
|                              | <20 – 40-60   | <b>0.001</b> |
|                              | <20 - >60     | -            |
|                              | 20-40 – 40-60 | 1.000        |
|                              | 20-40 - >60   | 1.000        |
|                              | 40-60 - >60   | 1.000        |
| Bare rock                    | <20 – 20-40   | 1.000        |
|                              | <20 – 40-60   | <b>0.020</b> |
|                              | <20 - >60     | 1.000        |
|                              | 20-40 – 40-60 | 0.074        |
|                              | 20-40 - >60   | 1.000        |
|                              | 40-60 - >60   | 1.000        |

**Table S8.** Pairwise comparison of the percent cover data across sites using PERMANOVA (999 permutations). *p*-values <0.05 are highlighted in bold.

|                        | F     | R <sup>2</sup> | <i>p</i> -value |
|------------------------|-------|----------------|-----------------|
| Algarrobo - El Quisco  | 2.88  | 0.03           | <b>0.025</b>    |
| Algarrobo - Las Cruces | 5.50  | 0.05           | <b>0.001</b>    |
| Algarrobo - Los Vilos  | 11.71 | 0.08           | <b>0.001</b>    |
| El Quisco - Las Cruces | 6.79  | 0.06           | <b>0.001</b>    |
| El Quisco - Los Vilos  | 8.45  | 0.06           | <b>0.001</b>    |
| Las Cruces - Los Vilos | 10.27 | 0.07           | <b>0.001</b>    |



**Table S9a.** Permutation test for homogeneity of multivariate dispersions on the percent cover data of the benthic community across sites. *p*-value <0.05 highlighted in bold.

|           | Df  | Sum Sq | Mean Sq | F    | N. perm | <i>p</i> -value |
|-----------|-----|--------|---------|------|---------|-----------------|
| Groups    | 3   | 0.20   | 0.07    | 3.01 | 999     | <b>0.036</b>    |
| Residuals | 233 | 5.13   | 0.02    |      |         |                 |

**Table S9b.** Pairwise comparison for homogeneity of multivariate dispersions on the percent cover data of the benthic community across sites. Observed *p*-value below diagonal, permuted *p*-value above diagonal. *p*-values <0.05 highlighted in bold.

|            | Algarrobo    | El Quisco    | Las Cruces   | Los Vilos    |
|------------|--------------|--------------|--------------|--------------|
| Algarrobo  | -            | 0.543        | <b>0.013</b> | 0.636        |
| El Quisco  | 0.529        | -            | <b>0.053</b> | 0.850        |
| Las Cruces | <b>0.011</b> | <b>0.049</b> | -            | <b>0.016</b> |
| Los Vilos  | 0.615        | 0.837        | <b>0.014</b> | -            |
